# Supplementary material for: First example of a heterobimetallic ‘Pd–Sn’ catalyst for direct activation of alcohol: efficient allylation, benzylation and propargylation of arenes, heteroarenes, active methylenes and allyl-Si nucleophiles
Source: Royal Society of Chemistry journal article supplement (doi:10.1039/c2ob25275a), 2012-01-01

## Electronic Supplementary Information (ESI)

### **First example of a heterobimetallic ‘Pd–Sn’ catalyst for direct activation of alcohol: Efficient allylation, benzylation and propargylation of arenes, heteroarenes, active methylenes and allyl-Si nucleophiles**

Debjit Das,<sup>†</sup> Sanjay Pratihar,<sup>†, ‡</sup> Ujjal Kanti Roy,<sup>†, δ</sup> Dipakranjan Mal,<sup>\*, †</sup> and Sujit Roy<sup>\*, †, ‡</sup>

<sup>†</sup>*Organometallics & Catalysis Laboratory, Chemistry Department, Indian Institute of Technology, Kharagpur 721302, India;*

<sup>δ</sup>*Deshabandhu Mahavidyalaya, Chittaranjan 713331, India*

*and*

<sup>‡</sup>*Organometallics & Catalysis Laboratory, School of Basic Sciences, Indian Institute of Technology, Bhubaneswar 751031, India*

[sujitroy.chem@gmail.com](mailto:sujitroy.chem@gmail.com)

## Table of Contents:

S-1.  $^1\text{H}$  NMR and  $^{13}\text{C}$  NMR Study for substrate catalyst interaction

S-2. Formation of reduced product (*E*)-1,3-di(*p*-tolyl)prop-2-en (**5**)

S-3. Spectra of the complexes and alkylated products

## S-1. Study for substrate catalyst interaction

### (a) Experimental procedure to study and observation for the interaction of alpha-allyl benzyl alcohol with [Pd-Sn] by $^1\text{H}$ NMR

To see the initial activation the spectrum of alpha-allyl benzyl alcohol **2b** (1.4 mg, 0.01 mmol) was recorded in  $\text{C}_6\text{D}_6$  solvent at room temperature in the absence as well as in the presence of catalyst **1a** (4.75 mg, 0.01 mmol). In the absence of catalyst **1a** the alcohol **2b** shows an unresolved broad singlet at 4.86 ppm for allylic proton and a singlet at 1.21 ppm for -OH proton. Upon addition of the catalyst **1a**, the initial broad singlet of the allylic -CH proton of **2b** was converted to a well resolved doublet ( $J=5.6$  Hz) at 5.45 ppm, while the peak for -OH proton almost vanishes.

$^1\text{H}$  NMR (400MHz) of alpha allyl benzyl alcohol in  $\text{C}_6\text{D}_6$

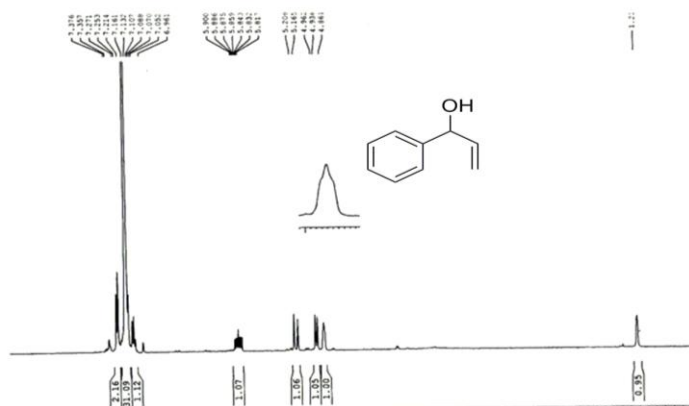

$^1\text{H}$  NMR (400MHz) of alpha allyl benzyl alcohol and  $\text{Pd}(\text{COD})\text{ClSnCl}_3$  in  $\text{C}_6\text{D}_6$

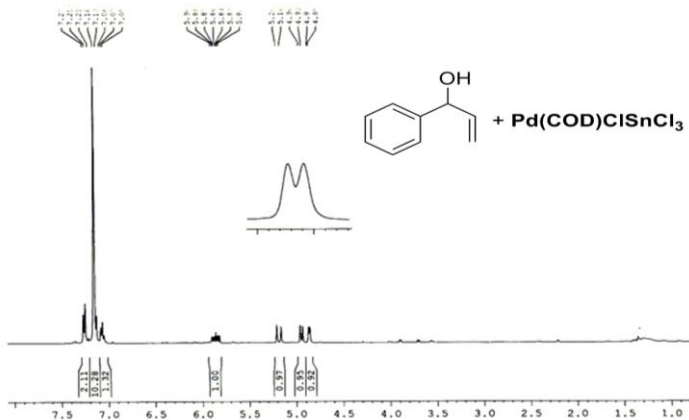

### (b) Procedure for the *In situ* $^{13}\text{C}$ NMR study

$^{13}\text{C}$  NMR of cinnamyl alcohol/benzyl alcohol was recorded at room temperature in the absence as well as in the presence of 1 eqv. of catalyst **1a** with respect to alcohol in  $\text{CDCl}_3$ .

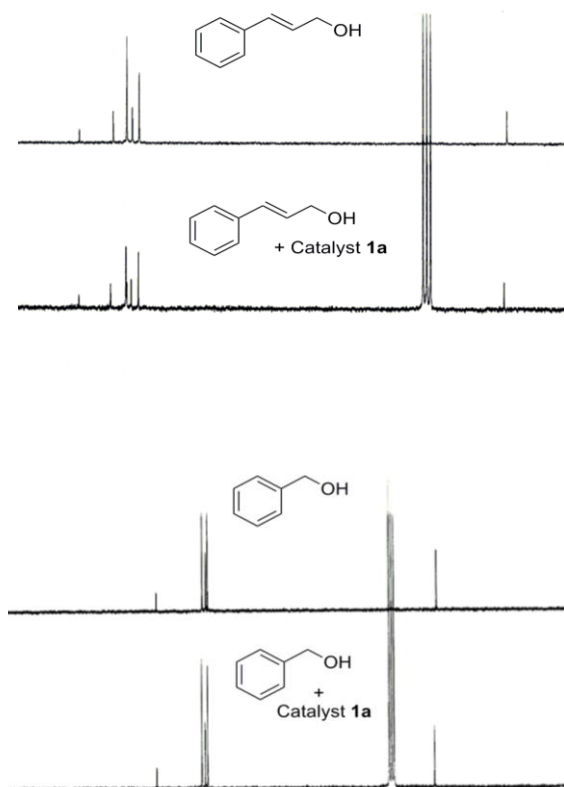

### S-2. Reaction of Vinylsilane: Formation of reduced product (*E*)-1,3-di(*p*-tolyl)prop-2-en (**5**)

A mixture of allyl alcohol **2f** (1 mmol), vinyltrimethylsilane (2 mmol), and  $[\text{Pd}(\text{COD})\text{Cl}(\text{SnCl}_3)]$  (2 mol %) in 2 mL of nitromethane was stirred at 85 °C for 1 hr. After that the reaction mixture was concentrated and purified by column chromatography to give 40% yield of **5**.

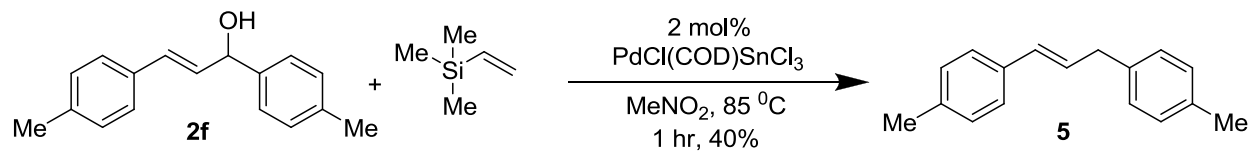

### S-3. Spectra of complexes and alkylated products

$^1\text{H}$  and  $^{13}\text{C}$  spectra of catalyst **1a**

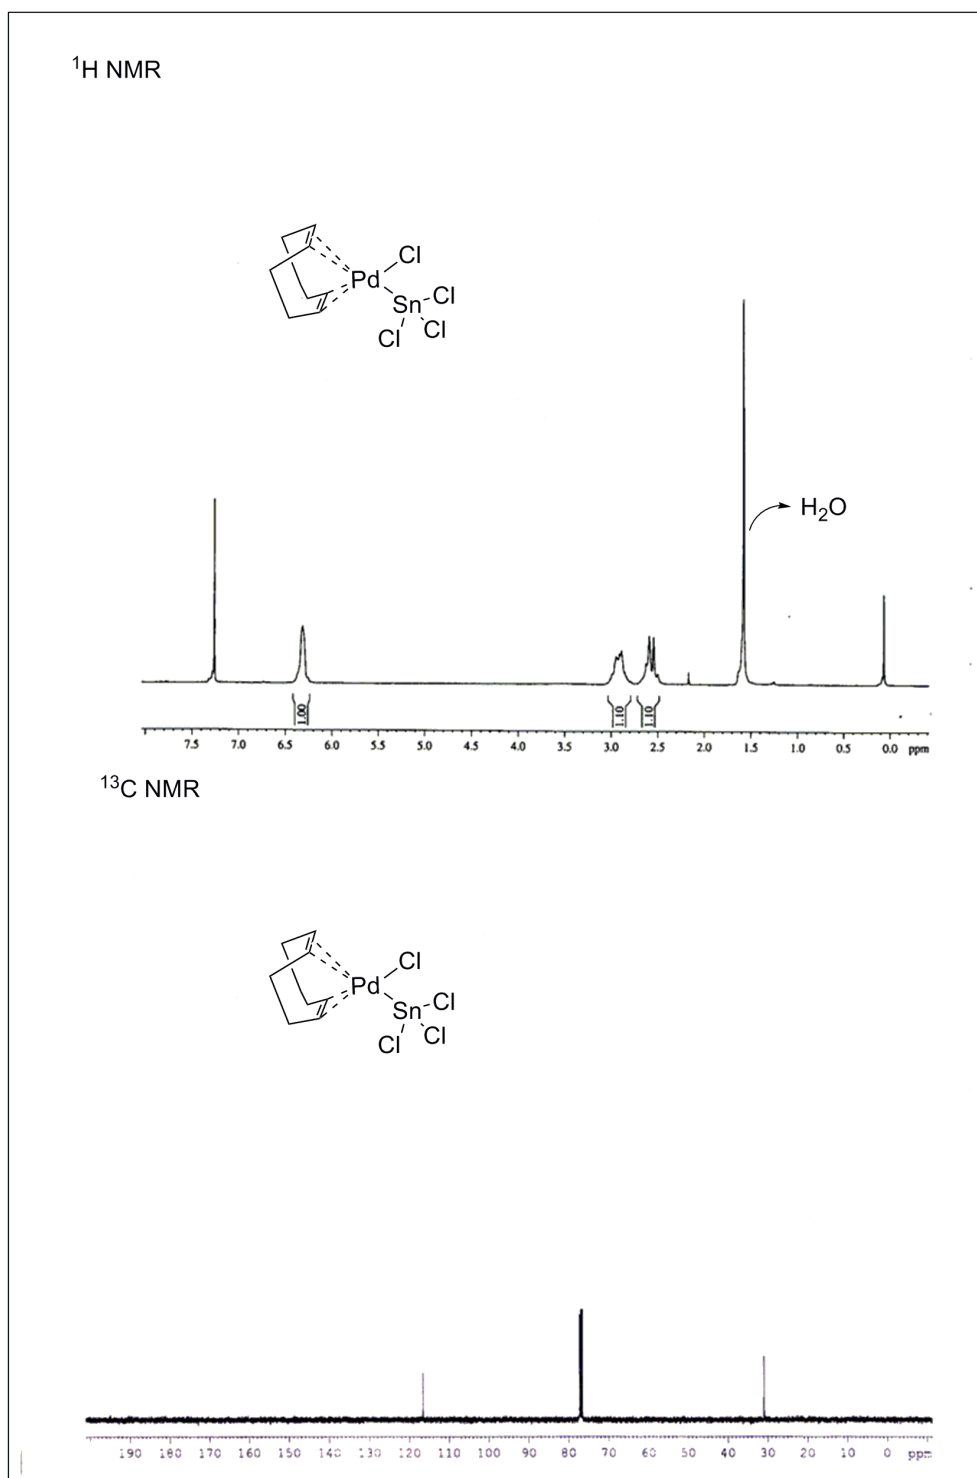

### DEPT spectra of catalyst **1a**

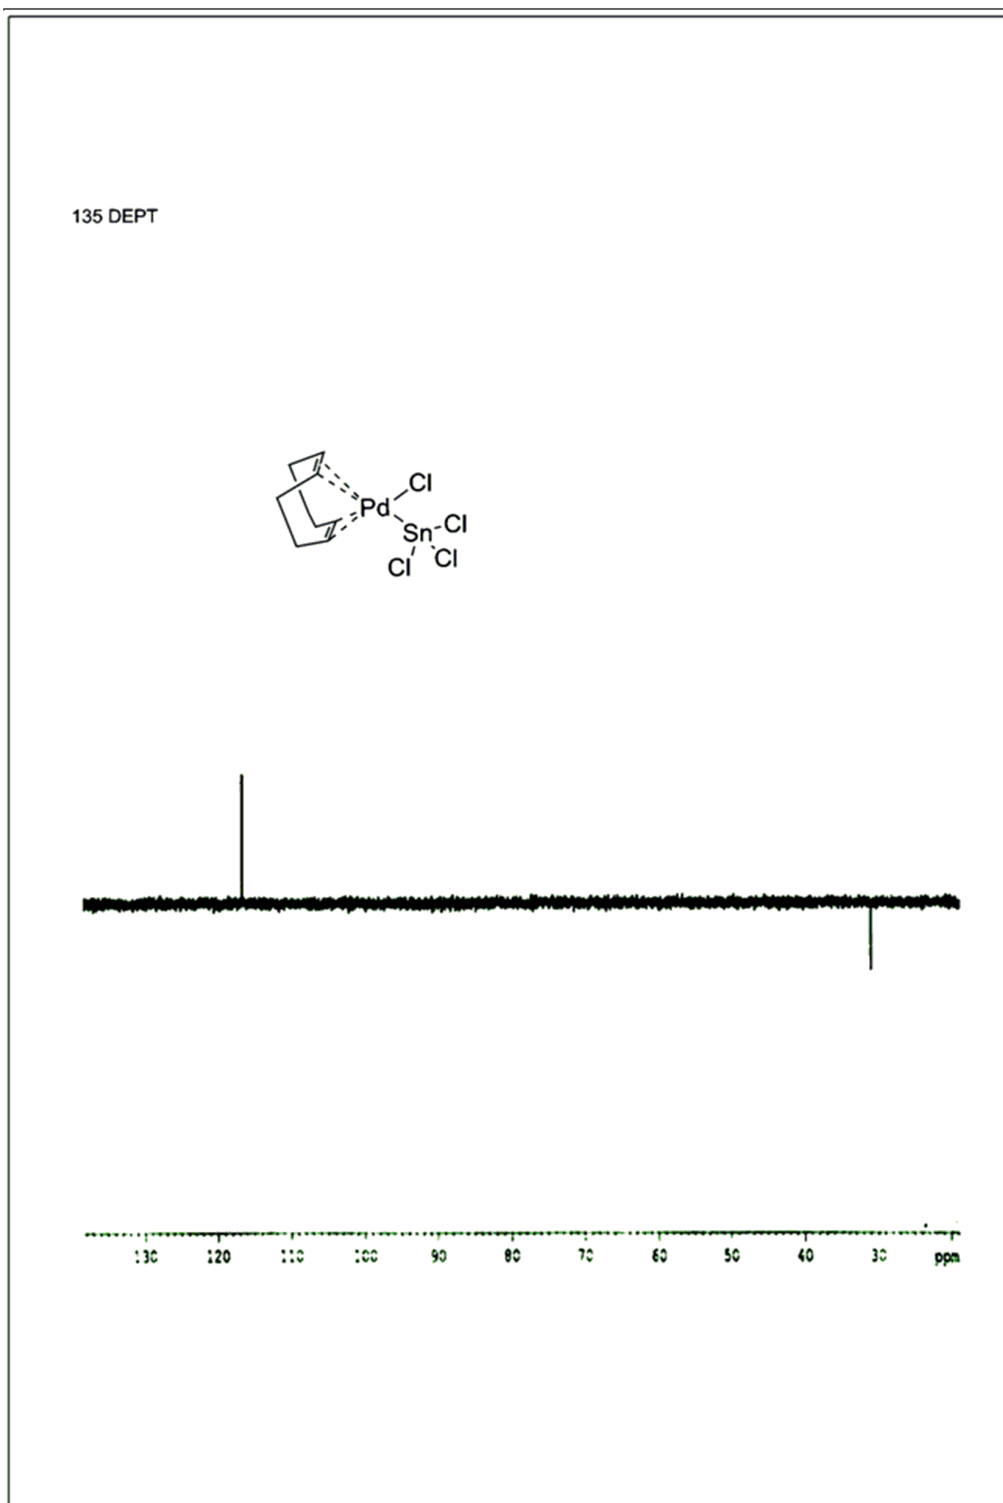

$^1\text{H}$  and  $^{13}\text{C}$  spectra of catalyst **1b**

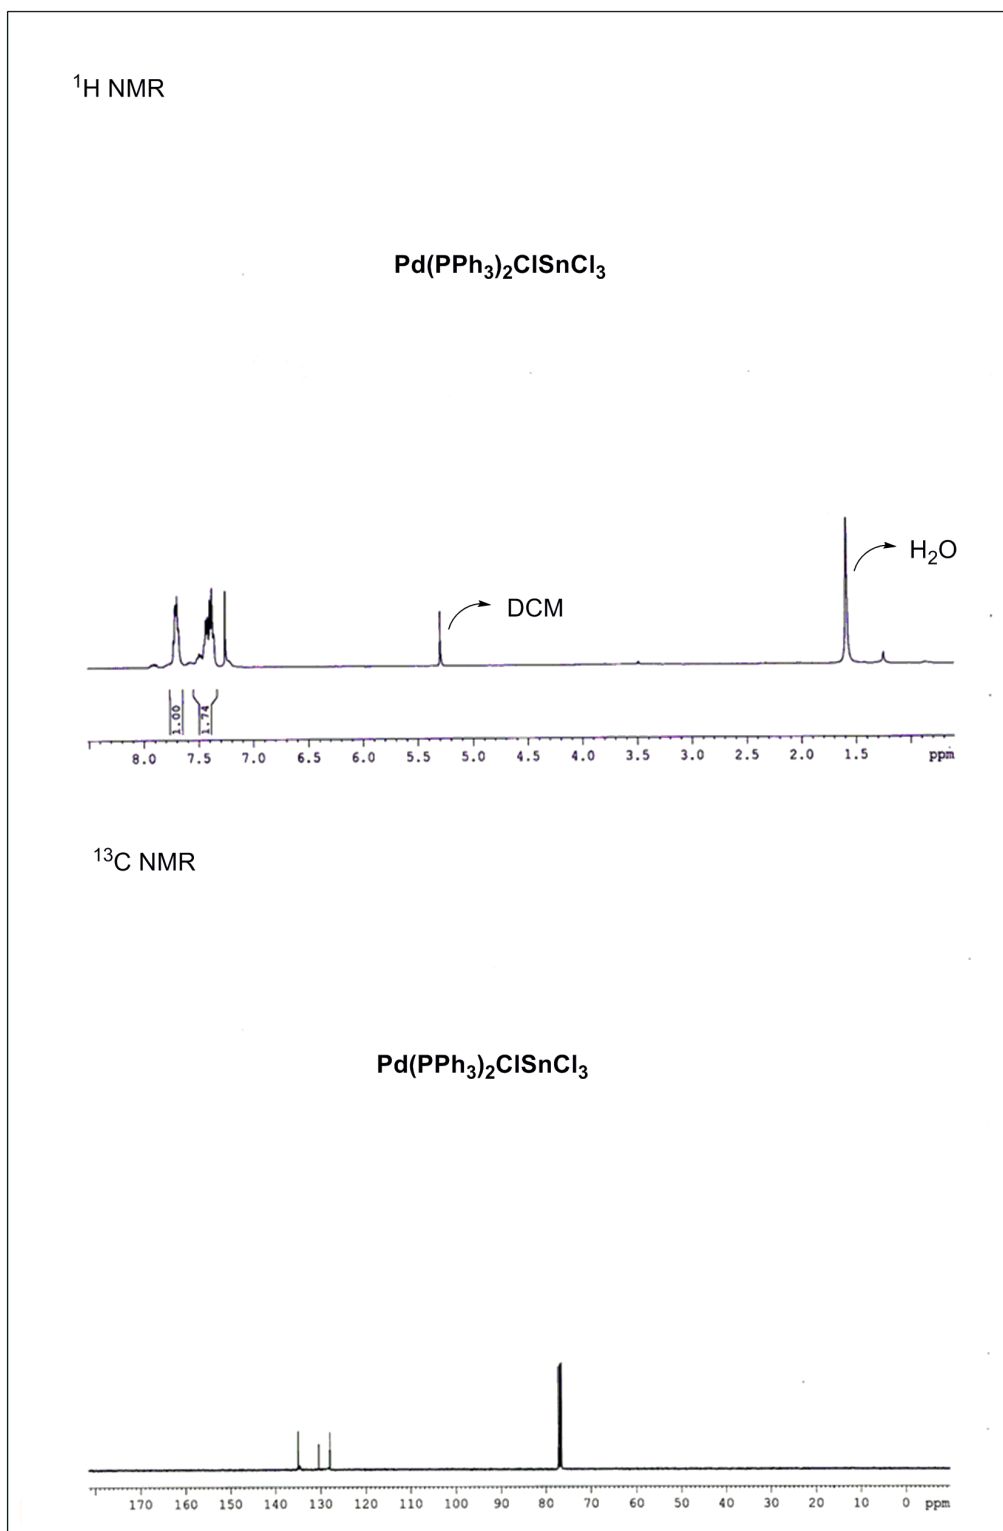

$^{31}\text{P}$  spectra of catalyst **1b**

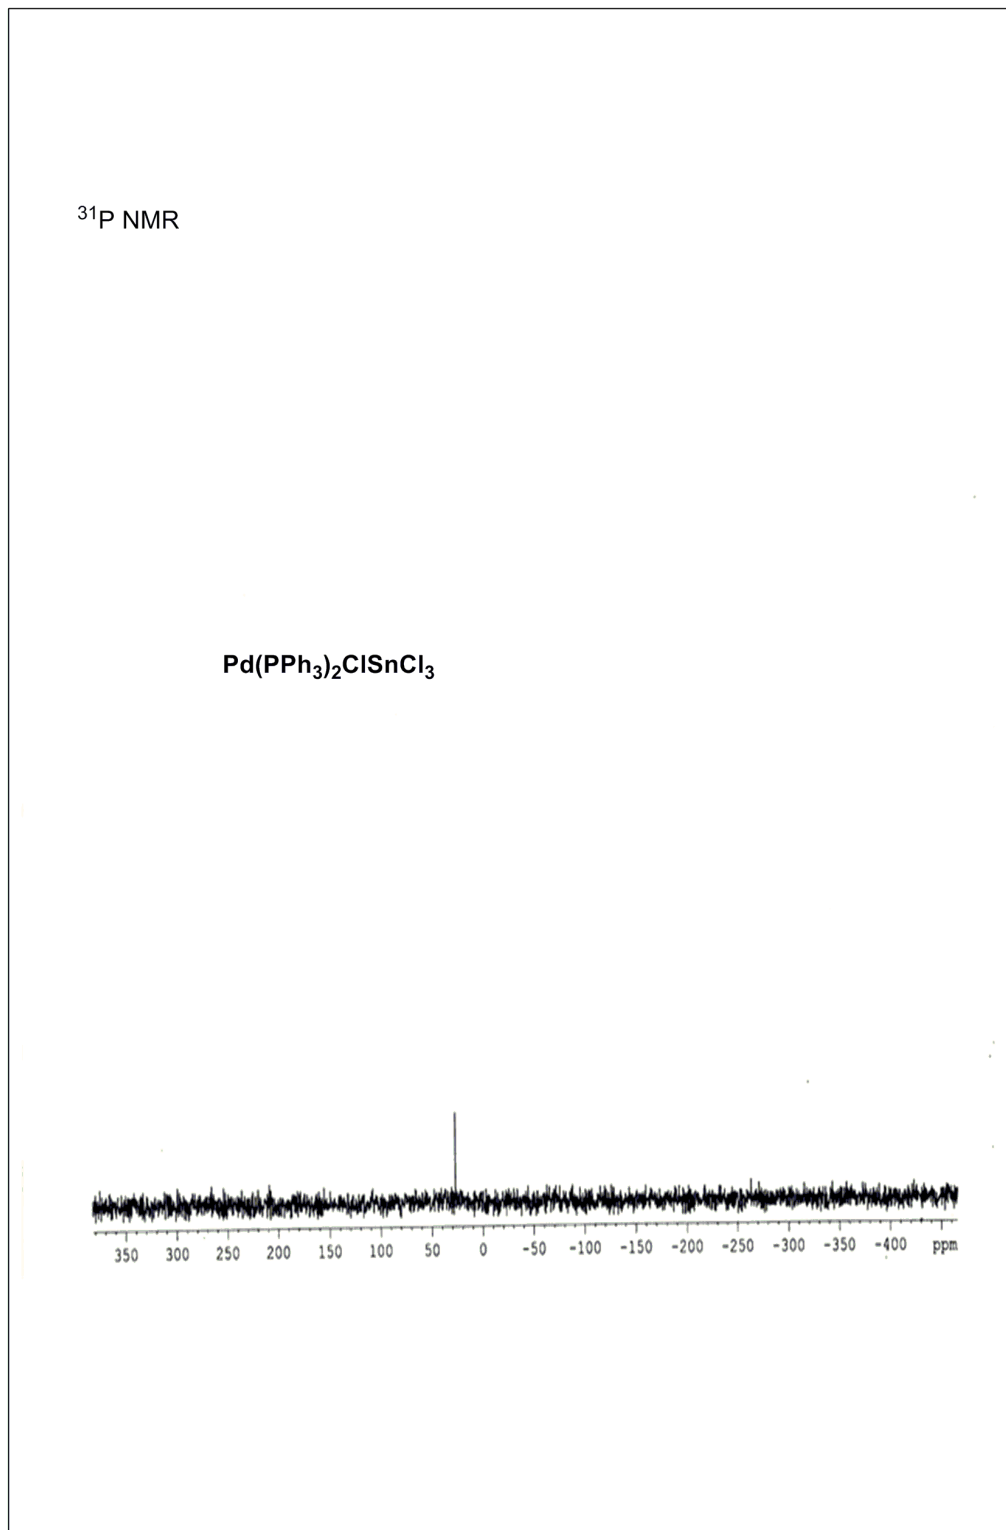



$^1\text{H}$  and  $^{13}\text{C}$  spectra of compound **4b'**

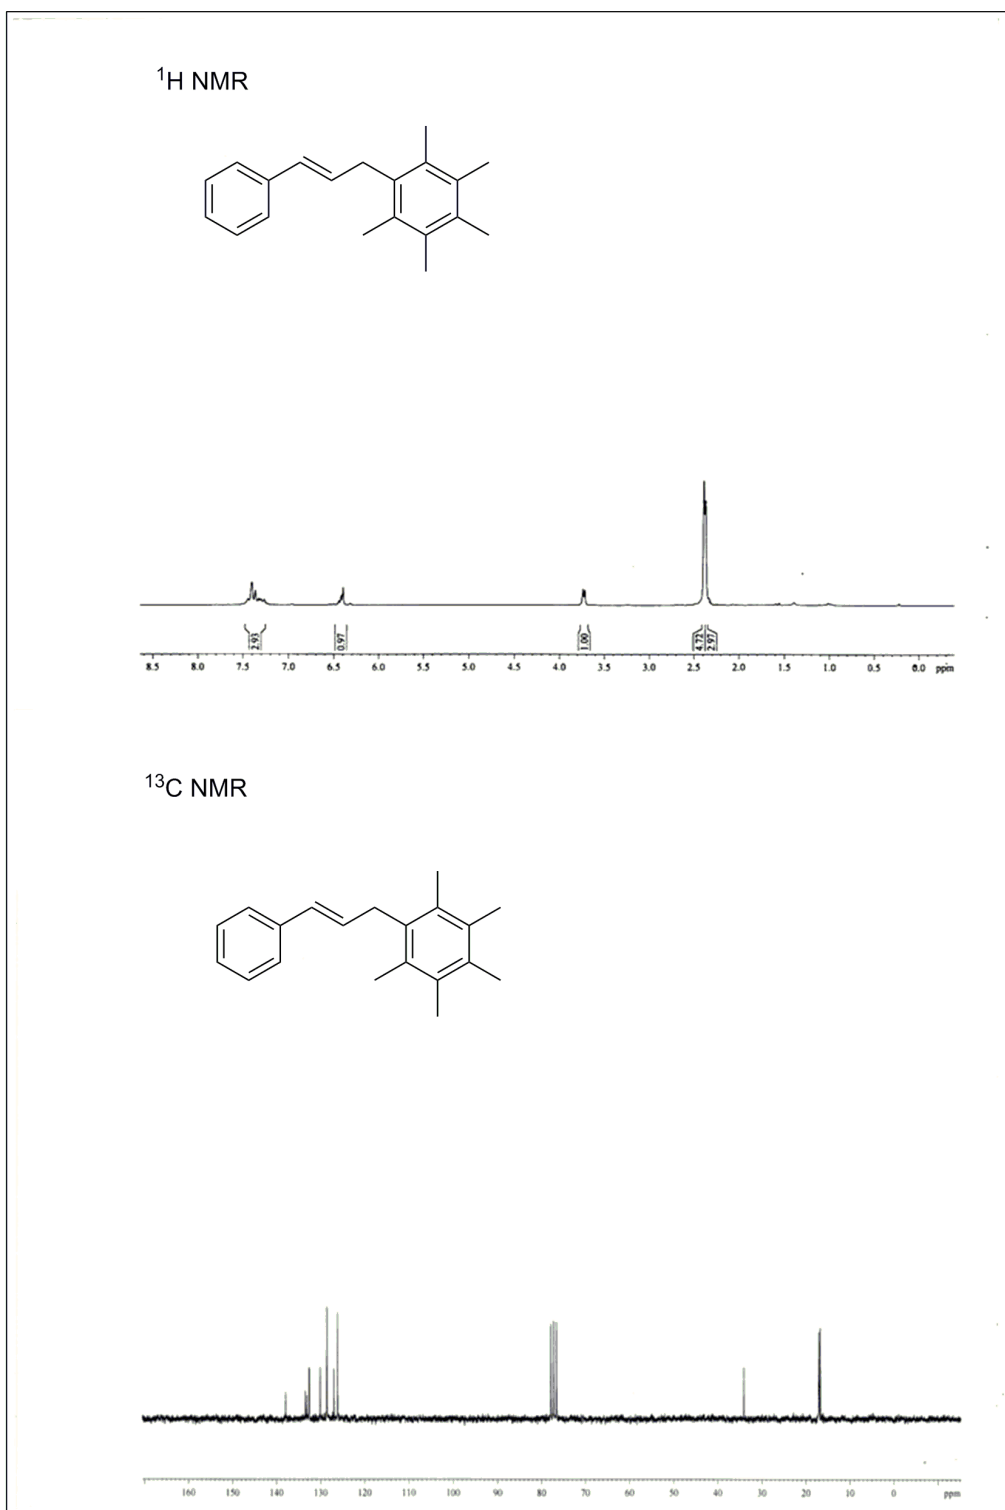

DEPT spectra of compound **4b'**

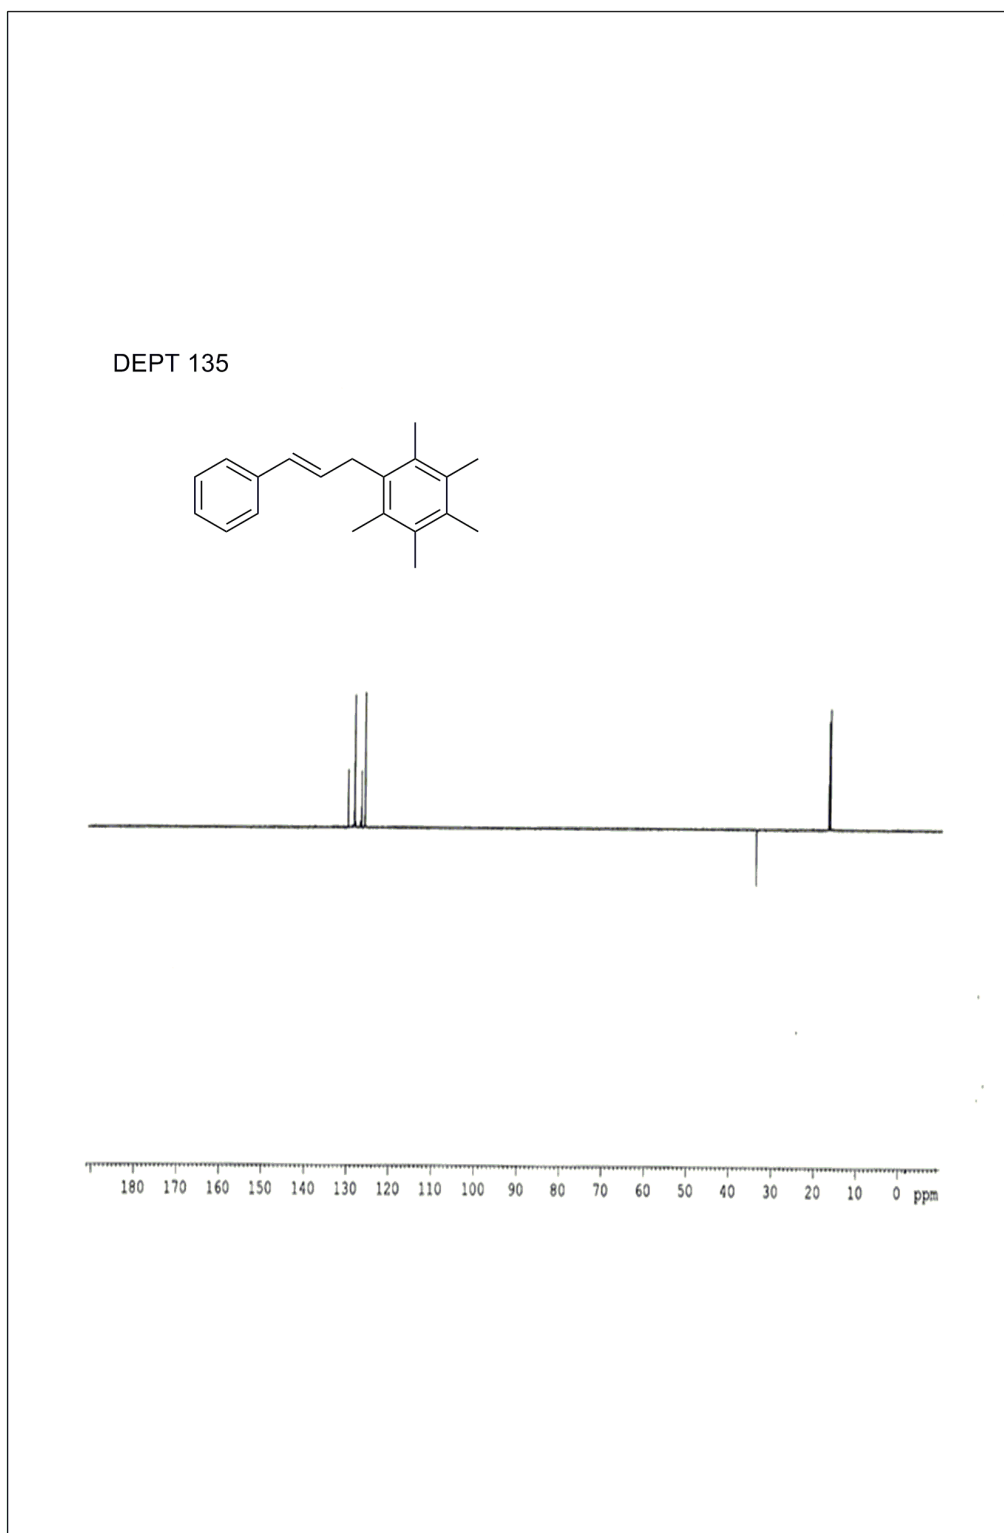

$^1\text{H}$  and  $^{13}\text{C}$  spectra of compound **4f** and **4f'**

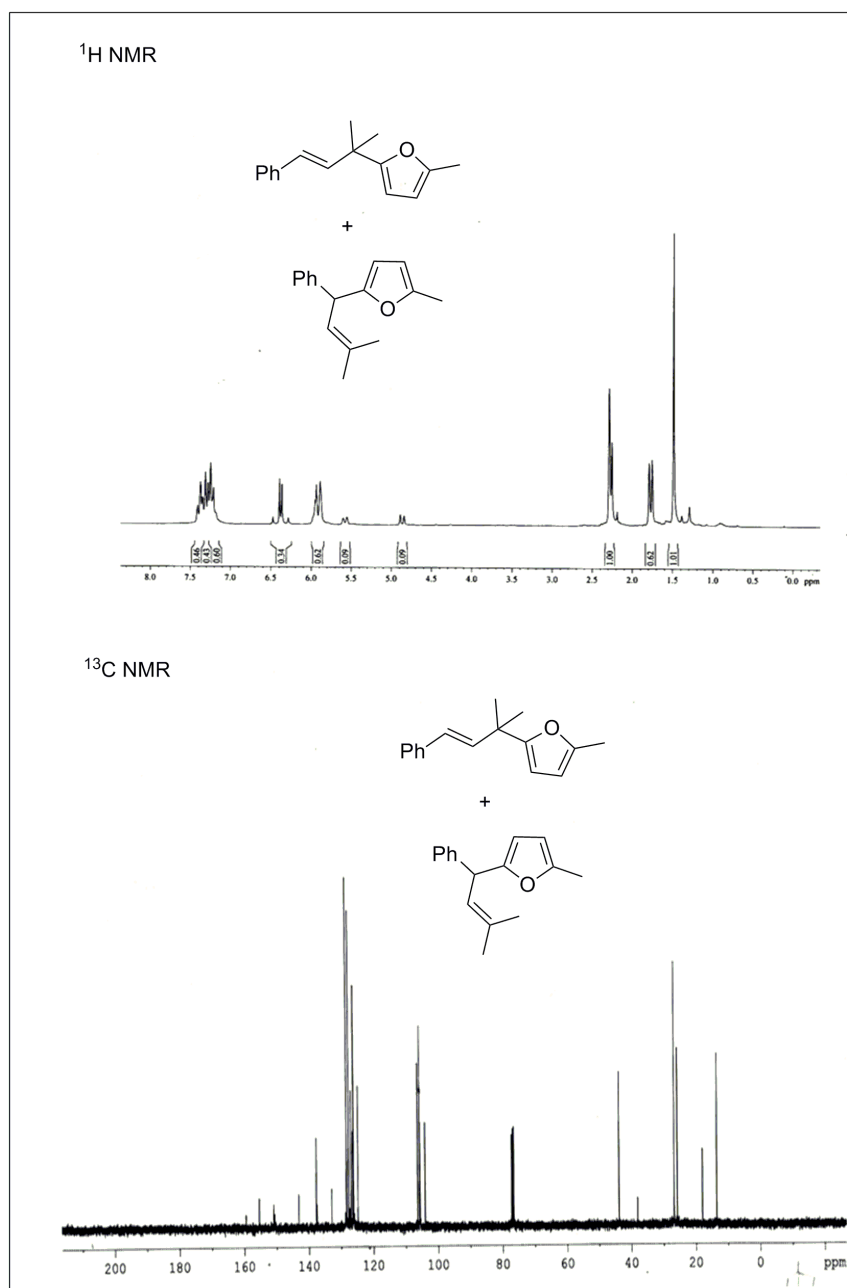

$^1\text{H}$  and  $^{13}\text{C}$  spectra of compound **4h** and **4h'**

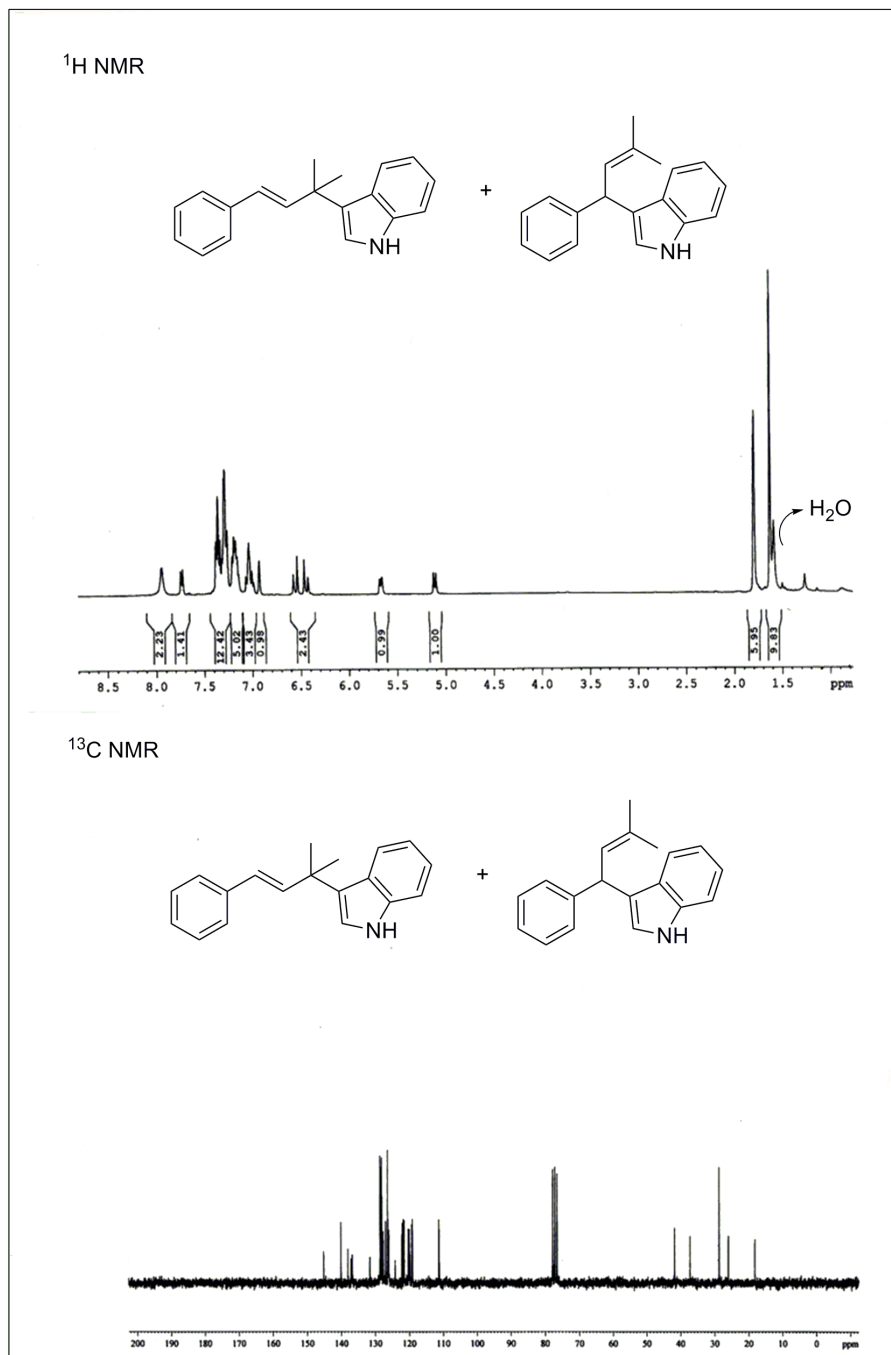

DEPT spectra of compound **4h** and **4h'**

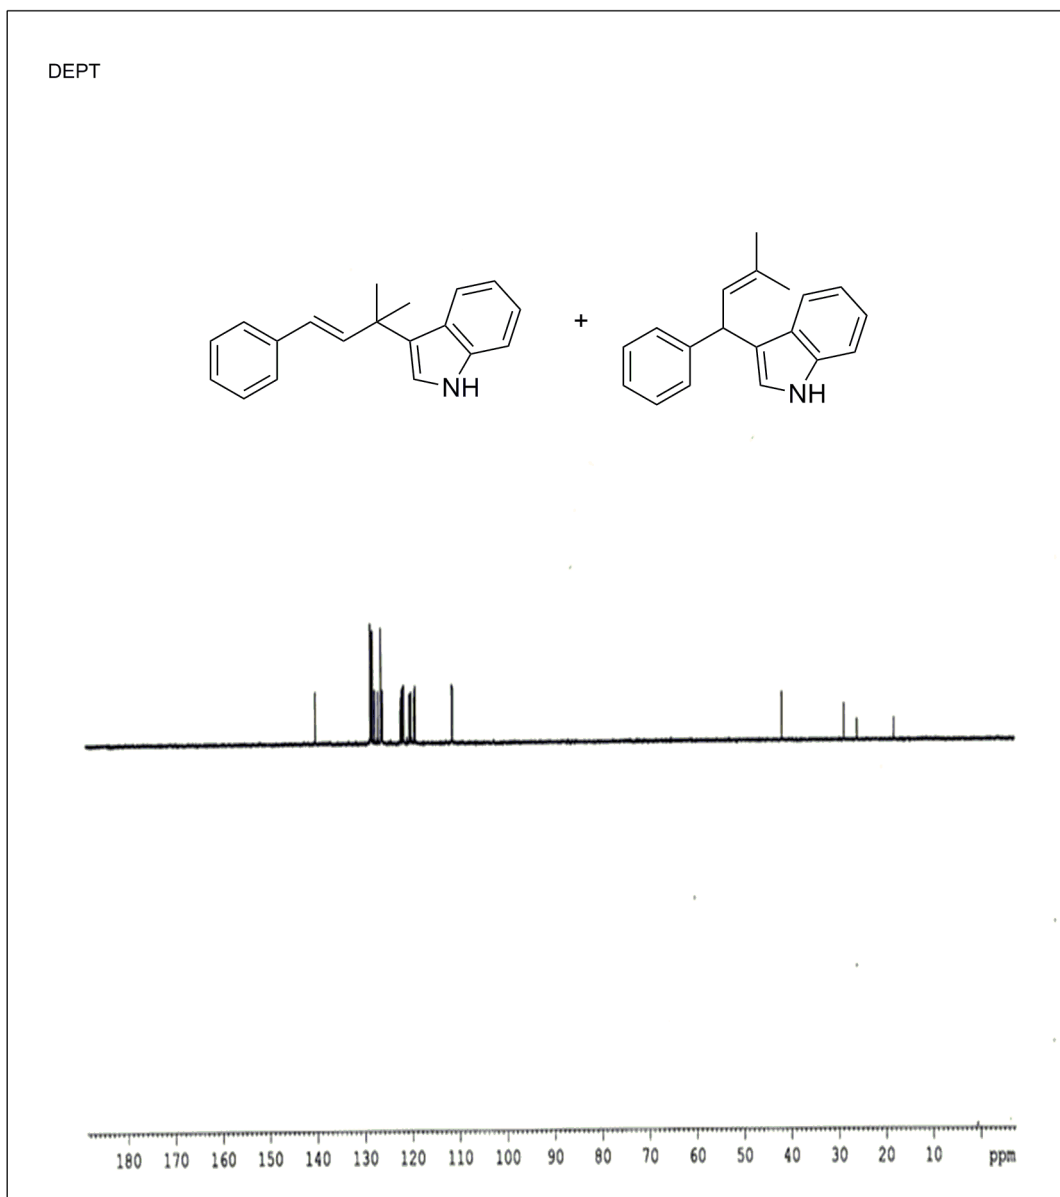

$^1\text{H}$  and  $^{13}\text{C}$  spectra of compound **4j**

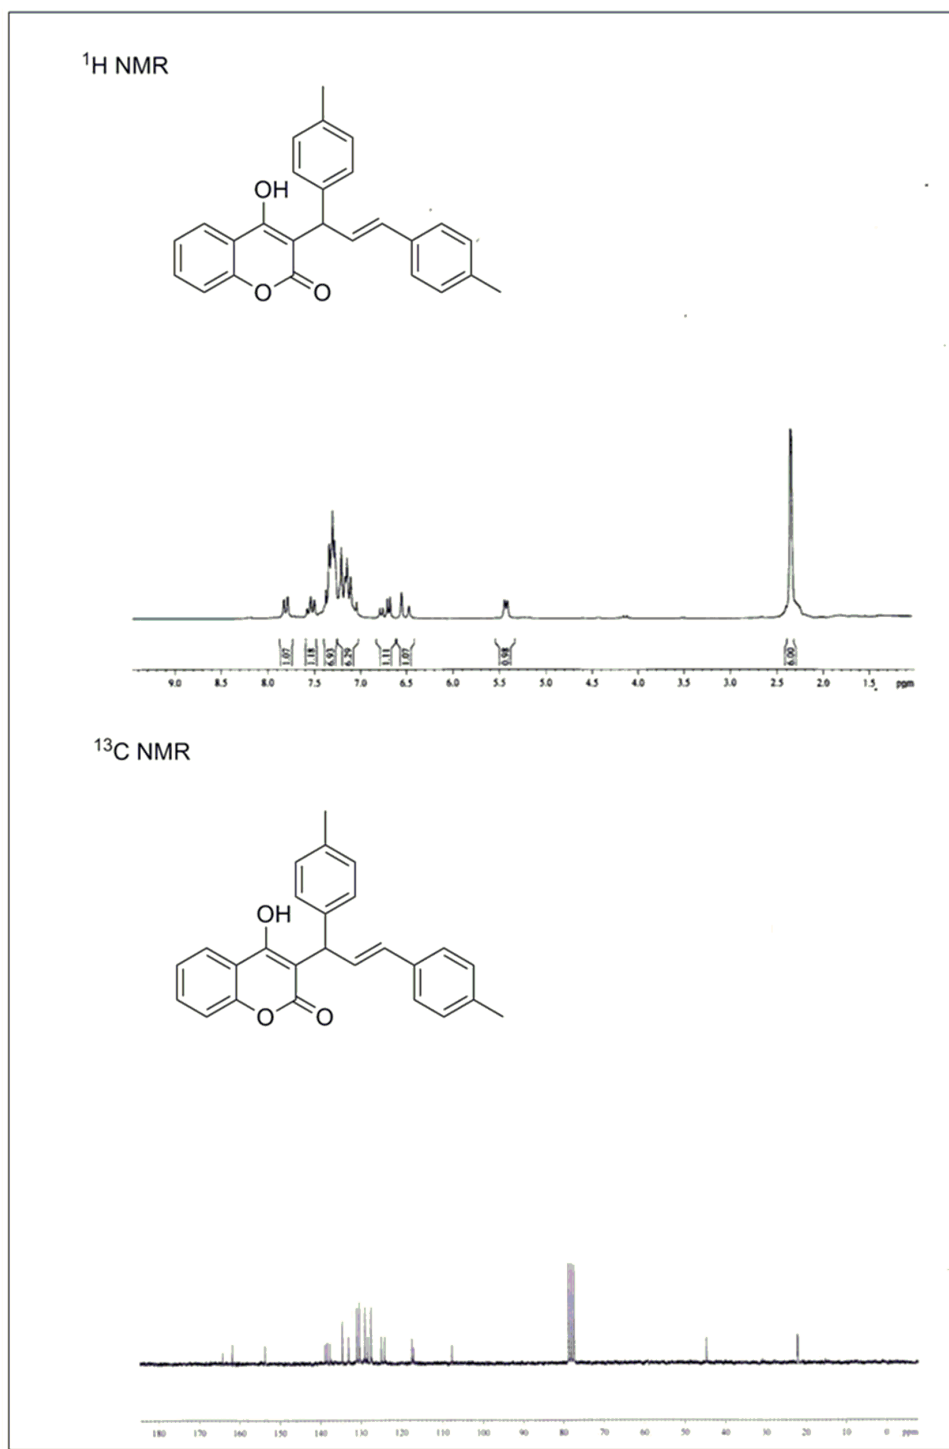

### $^1\text{H}$ and $^{13}\text{C}$ spectra of compound **4k**

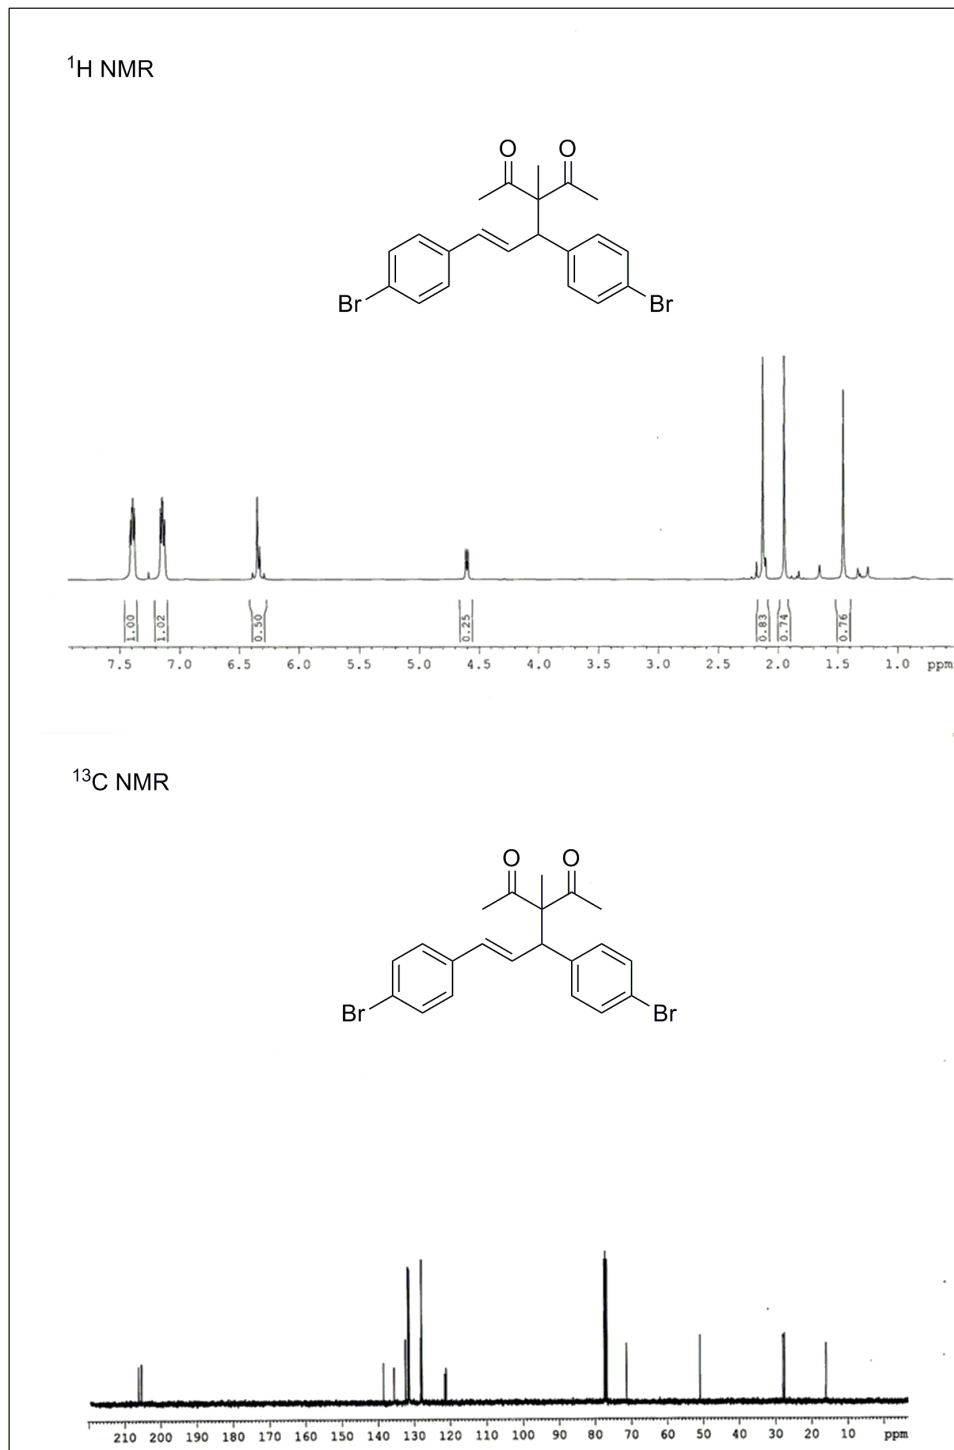

DEPT spectra of compound **4k**

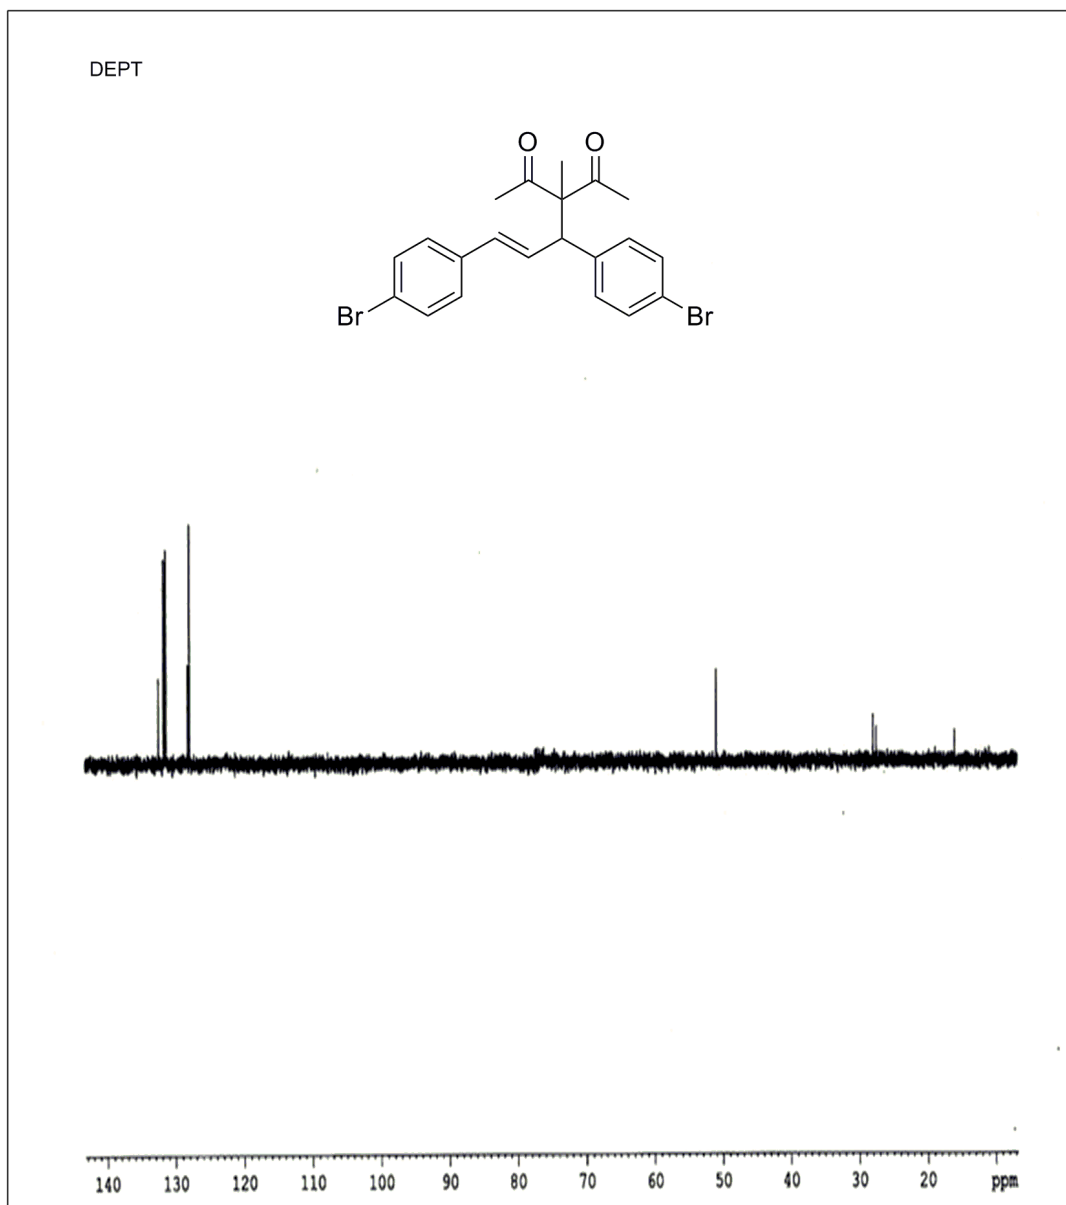



# $^1\text{H}$ and $^{13}\text{C}$ spectra of compound **4I**

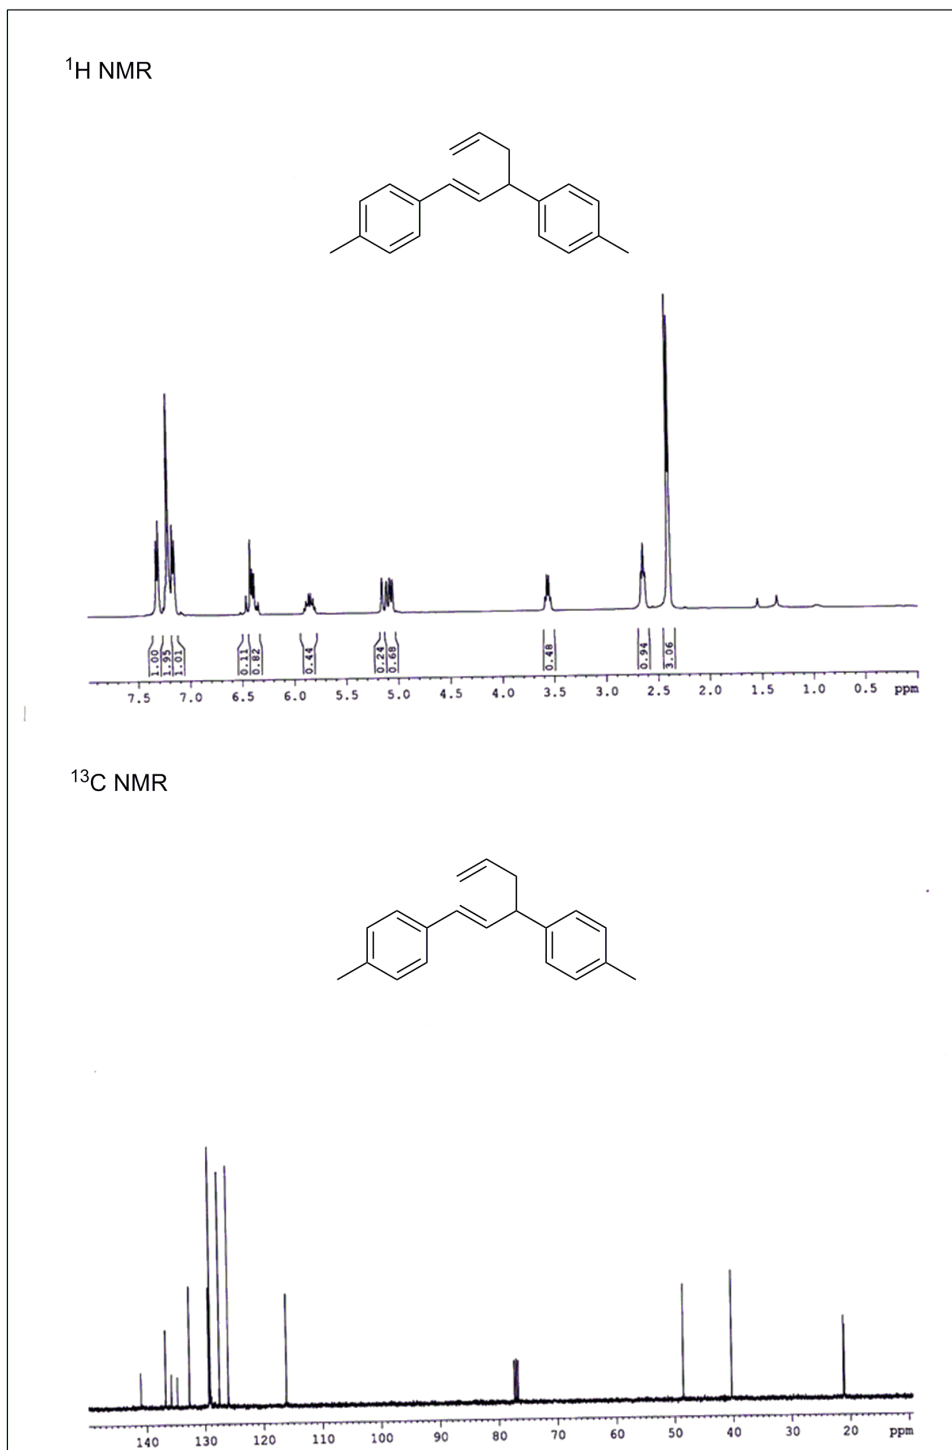

### DEPT spectra of compound **41**

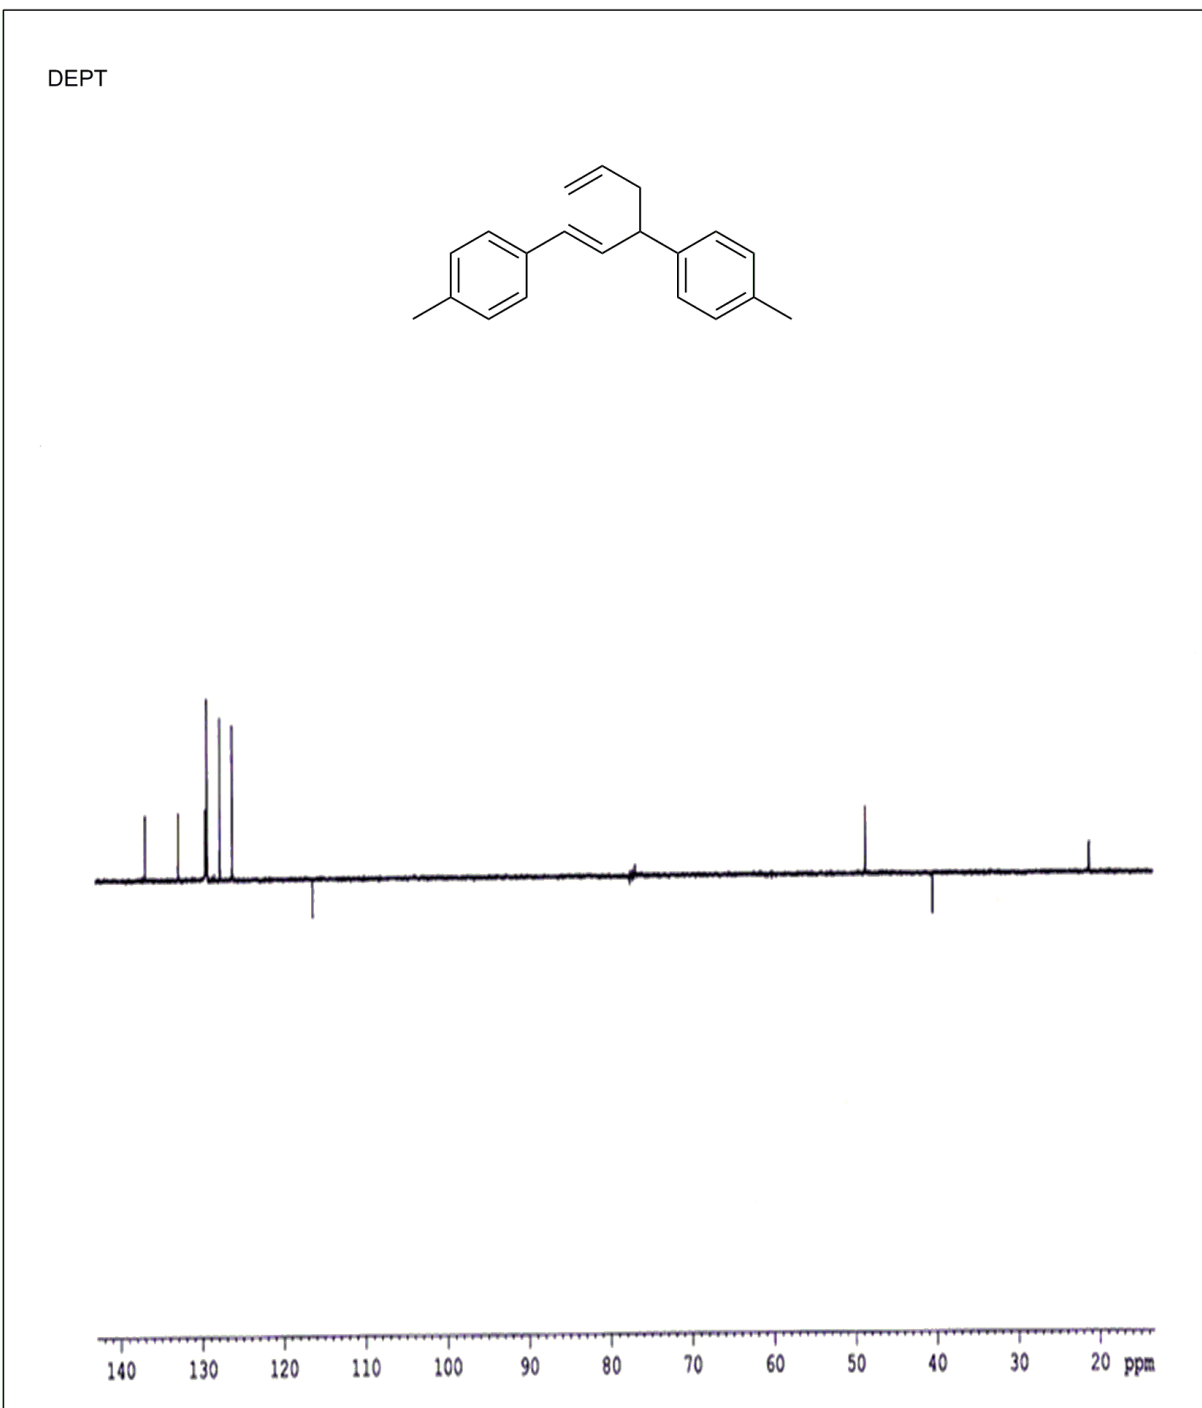

### $^1\text{H}$ and $^{13}\text{C}$ spectra of compound **4o**

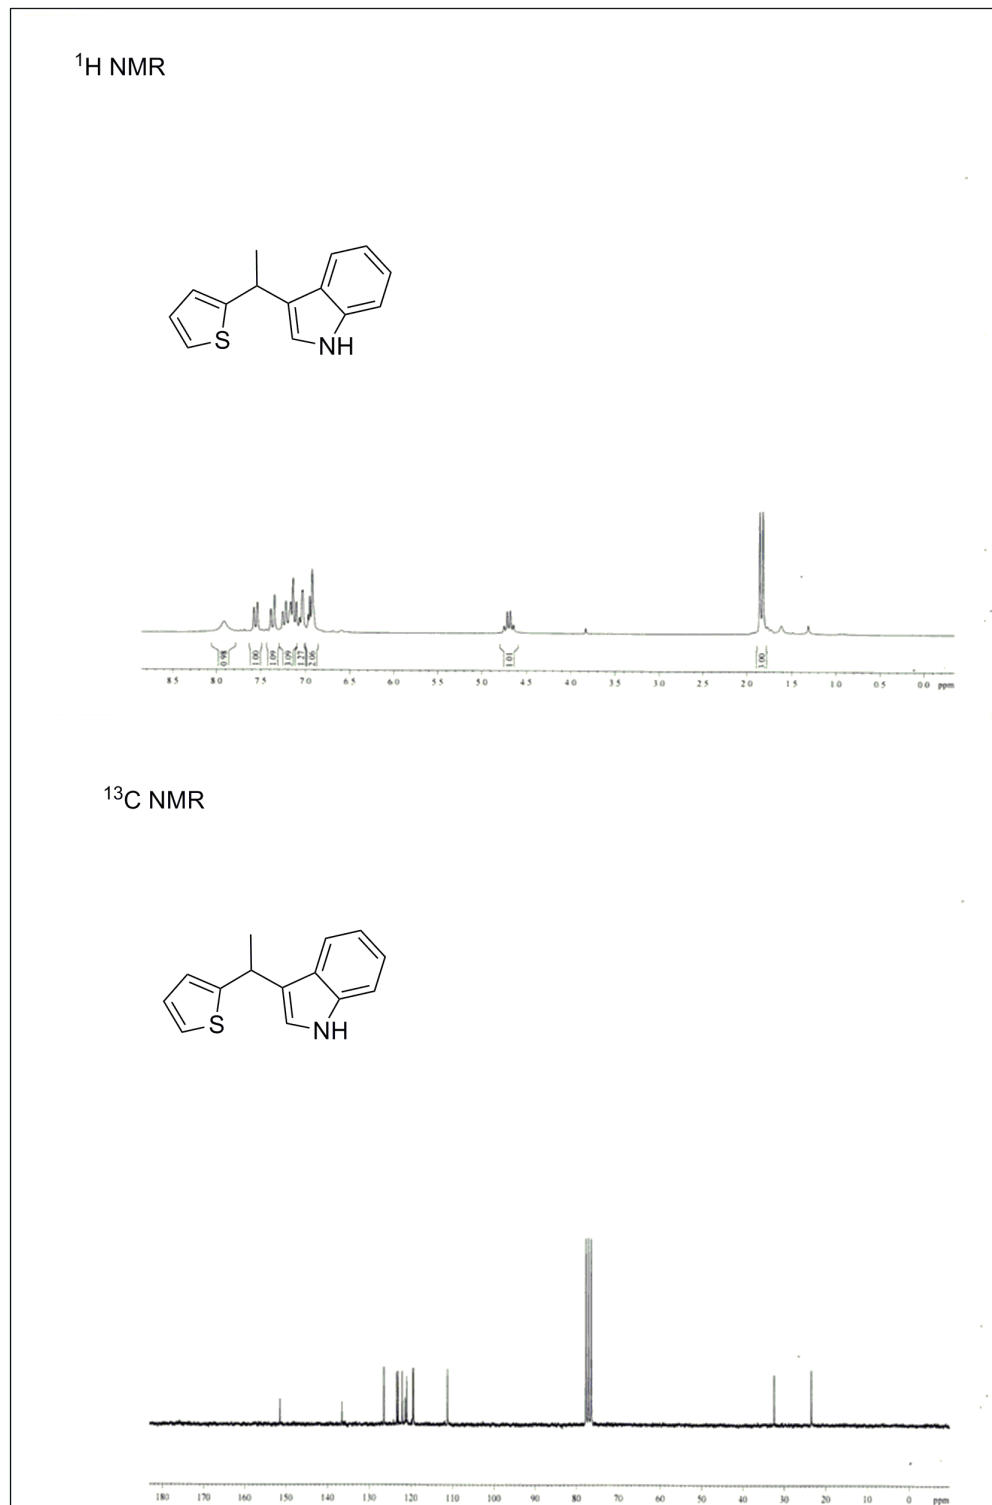

# $^1\text{H}$ and $^{13}\text{C}$ spectra of compound **4t**

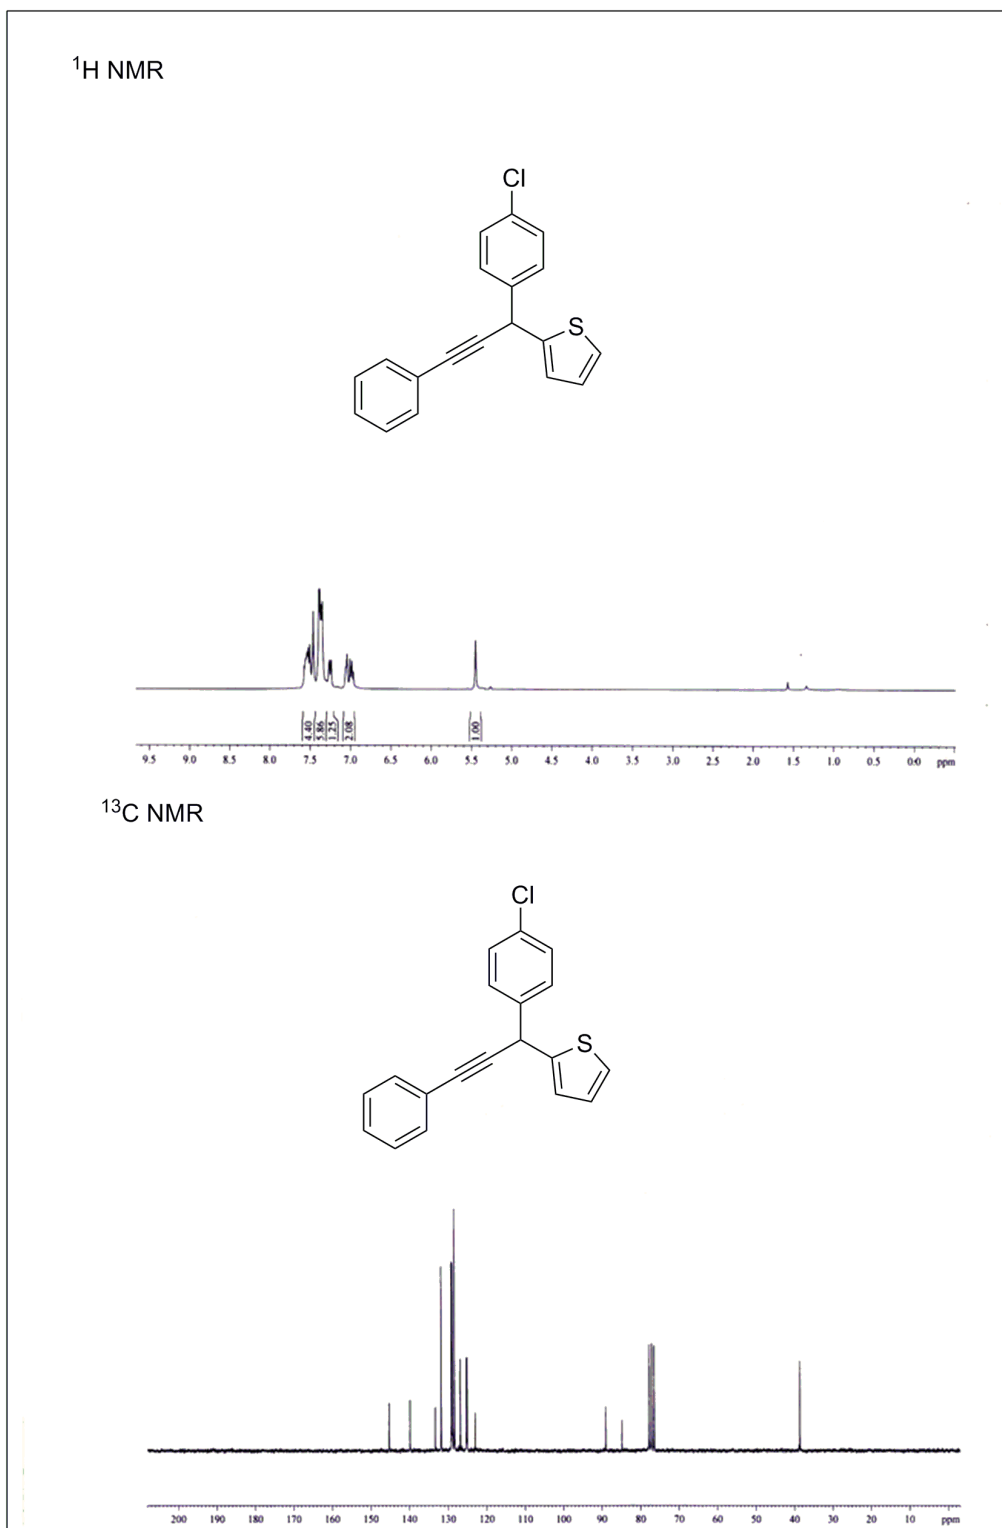

$^1\text{H}$  and  $^{13}\text{C}$  spectra of compound **4v**

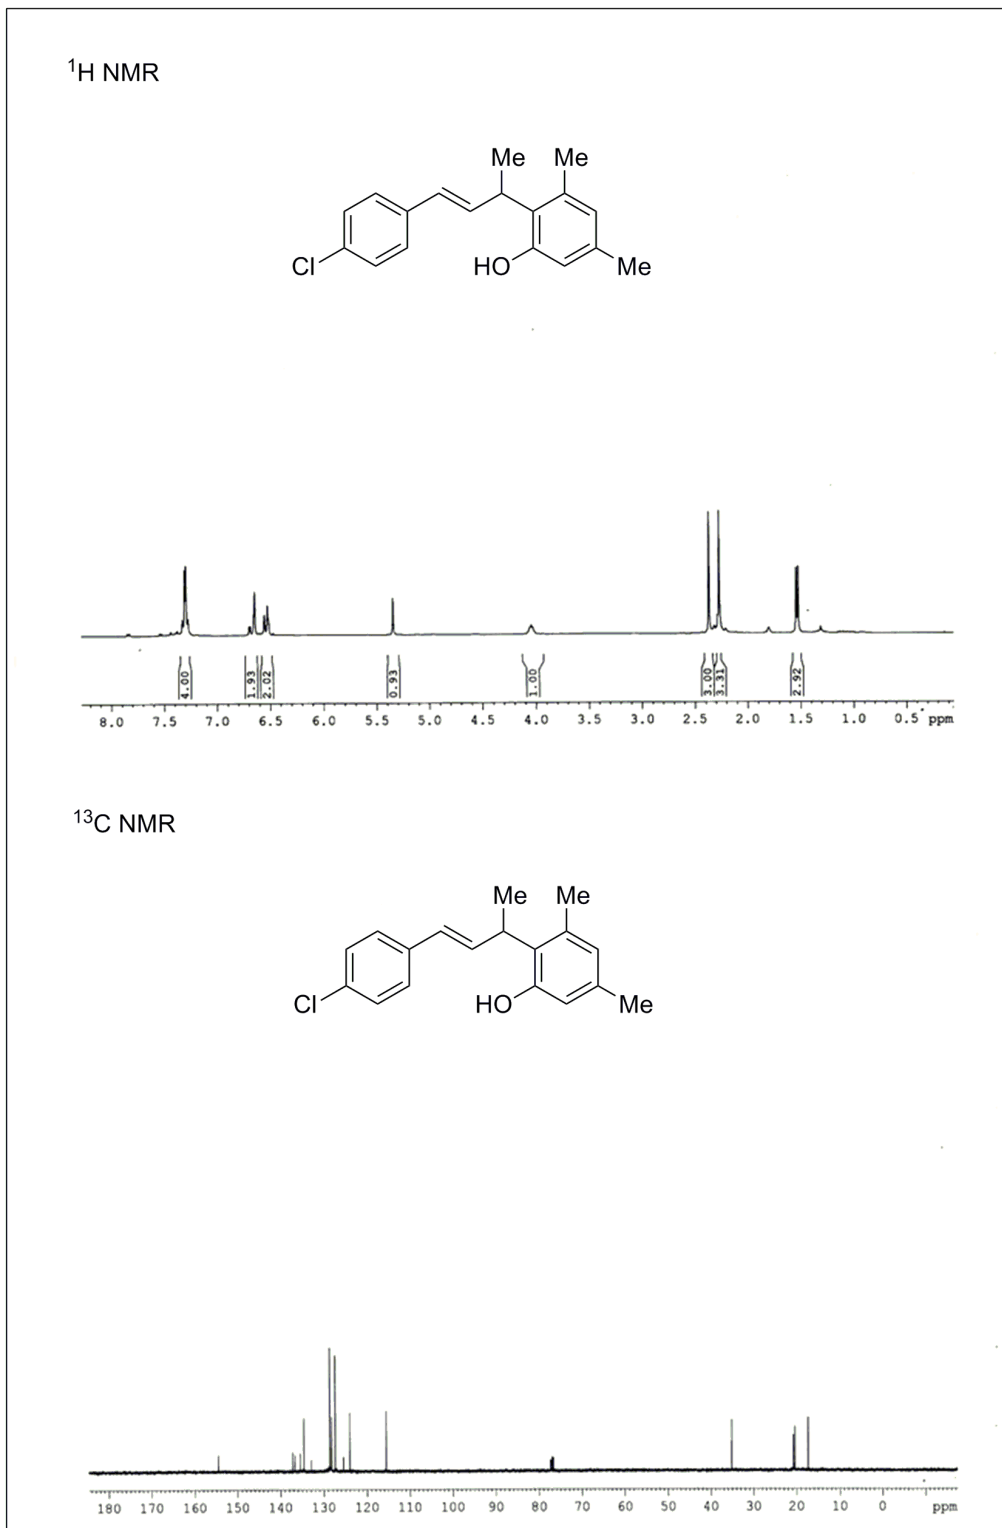

DEPT of compound **4v**

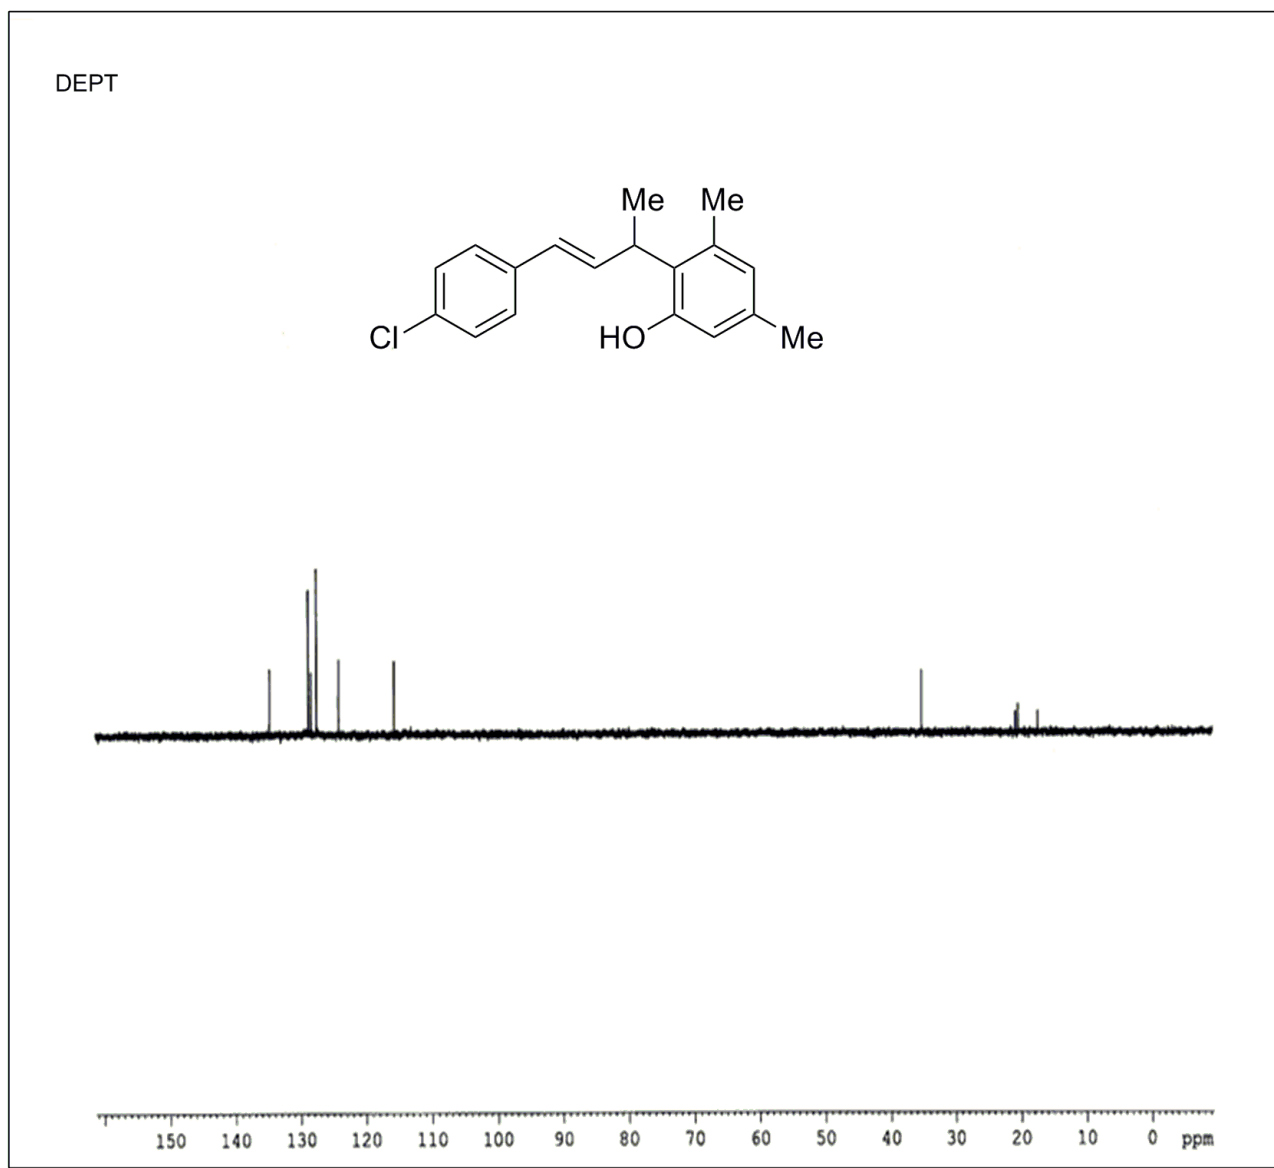

$^1\text{H}$  and  $^{13}\text{C}$  spectra of compound **4z**

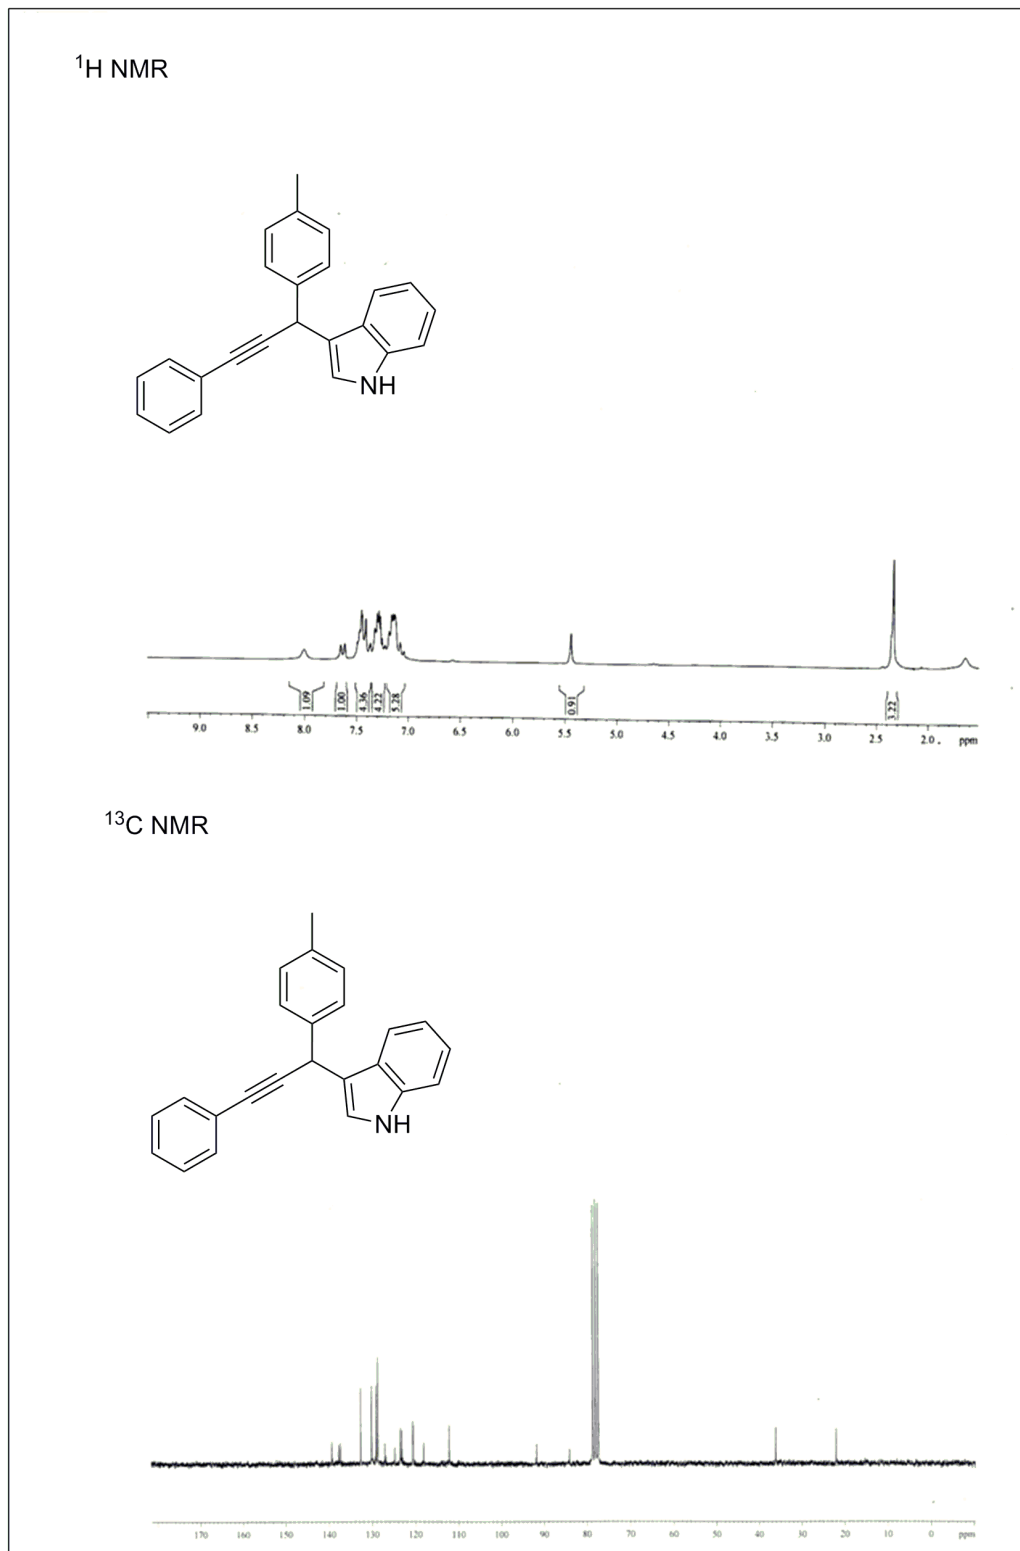

Supplement: c2ob25275a.pdf [file c2ob25275a.pdf]
